# Supplementary material for: The Cytotoxicity of Carbon Nanotubes and Hydroxyapatite, and Graphene and Hydroxyapatite Nanocomposites against Breast Cancer Cells
Source: MDPI journal article supplement (doi:10.3390/nano13030556), 2023-01-30
Supplement: s1 [file s1]

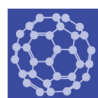

## Supplementary Materials

# The Cytotoxicity of Carbon Nanotubes and Hydroxyapatite, and Graphene and Hydroxyapatite Nanocomposites Against Breast Cancer Cells

Tristan Nguyen <sup>1</sup>, Anuj Maniyar <sup>1</sup>, Mrinmoy Sarkar <sup>1</sup>, Tapasree Roy Sarkar <sup>1,\*</sup> and Gururaj M. Neelgund <sup>2,\*</sup>

<sup>1</sup> Department of Biology, Texas A&M University, College Station, TX 77843, USA

<sup>2</sup> Department of Chemistry, Prairie View A&M University, Prairie View, TX 77446, USA

\* Correspondence: tsarkar@bio.tamu.edu (T.R.S.); gmneelgund@pvamu.edu (G.M.N.)

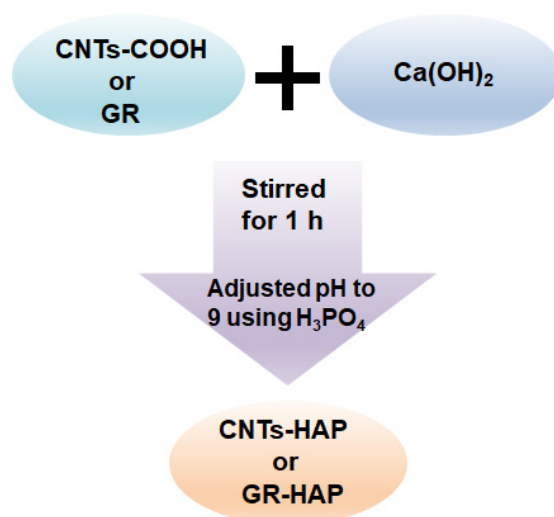

**Scheme S1.** Schematic representation of grafting of HAP over CNTs and GR.

**Table S1.** demonstrates the cytotoxicity of CNT-HAP on MCF7 cells.

|             | Control       | 5 µg/mL        | 25 µg/mL         | 50 µg/mL         |
|-------------|---------------|----------------|------------------|------------------|
| <b>24 h</b> | 100.00 ± 0.00 | 98.21 ± 2.83   | 67.91 ± 0.58***  | 24.51 ± 1.64***  |
| <b>48 h</b> | 100.00 ± 0.00 | 112.85 ± 29.44 | 59.58 ± 3.39***# | 19.29 ± 0.49***# |

\*\*\* $p < 0.001$  indicates significant difference compared to control, whereas # $p < 0.05$  indicates significant difference compared to 24 h data.

**Table S2.** demonstrates the cytotoxicity of GR-HAP on MCF7 cells.

|             | Control       | 5 µg/mL       | 25 µg/mL         | 50 µg/mL         |
|-------------|---------------|---------------|------------------|------------------|
| <b>24 h</b> | 100.00 ± 0.00 | 106.96 ± 8.32 | 84.36 ± 4.70     | 44.77 ± 5.80***  |
| <b>48 h</b> | 100.00 ± 0.00 | 105.41 ± 6.88 | 66.10 ± 3.28***# | 14.83 ± 2.57***# |

\*\*\* $p < 0.001$  indicates significant difference compared to control, whereas # $p < 0.05$  indicates significant difference compared to 24 h data.

**Table S3.** demonstrates the cytotoxicity of CNT-HAP on SUM-159 cells.

|             | Control       | 5 µg/mL         | 25 µg/mL        | 50 µg/mL        |
|-------------|---------------|-----------------|-----------------|-----------------|
| <b>24 h</b> | 100.00 ± 0.00 | 85.93 ± 0.78*** | 45.53 ± 3.28*** | 17.90 ± 1.31*** |
| <b>48 h</b> | 100.00 ± 0.00 | 90.23 ± 3.91*   | 43.89 ± 2.38*** | 16.21 ± 2.78*** |

\*\*\* $p < 0.001$  and \* $p < 0.05$  indicates significant difference compared to control.

**Table S4.** demonstrates the cytotoxicity of GR-HAP on SUM-159 cells.

|             | Control       | 5 µg/mL        | 25 µg/mL        | 50 µg/mL         |
|-------------|---------------|----------------|-----------------|------------------|
| <b>24 h</b> | 100.00 ± 0.00 | 88.06 ± 5.74** | 41.16 ± 4.18*** | 30.46 ± 2.34***  |
| <b>48 h</b> | 100.00 ± 0.00 | 103.06 ± 8.45  | 56.98 ± 4.91*** | 22.77 ± 1.00***# |

\*\*\* $p < 0.001$  and \*\* $p < 0.01$  indicates significant difference compared to control, whereas # $p < 0.05$  indicates significant difference compared to 24 h data.
